# Supplementary material for: A Genome-wide Study of Common and Rare Genetic Variants Associated with Circulating Thrombin Activatable Fibrinolysis Inhibitor
Source: PubMed Central journal article supplement — Thromb Haemost. 2018 Jan 29;118(2):298–308. doi: 10.1160/TH17-04-0249 (PMC6260132; doi:10.1160/th17-04-0249), 2018-01-29
Supplement: 10-1160-th17-04-0249-s170249-1.pdf [file 10-1160-th17-04-0249-s170249-1.pdf]

**Supplementary Table S1** Summary of TAFI measurement used in previous studies and whether validated to be isoform-independent and characterized for reactivity toward the various TAFI forms (intact TAFI, TAFIa, TAFIai, released AP, smaller fragmentation products)

| Ref nr | First Author | TAFI measure         | Method                                                                                                       | Conclusion                                                                                 | Comment                                                                                                      |
|--------|--------------|----------------------|--------------------------------------------------------------------------------------------------------------|--------------------------------------------------------------------------------------------|--------------------------------------------------------------------------------------------------------------|
| 7      | Franco       | TAFI-Ag              | ELISA, (monoclonal mouse and a polyclonal rabbit IgG, as used by Mosnier et al, 1998)                        | CPB2 promoter SNPs are associated with TAFI-Ag and may influence risk of venous thrombosis | No data on isoform-independent validation nor on possible differential reactivity toward various TAFI forms. |
| 8      | Van Tilburg  | TAFI-Ag              | Electroimmunoassay (polyclonal rabbit)                                                                       | Elevated TAFI levels are a mild risk factor for venous thrombosis                          | No data on isoform-independent validation nor on possible differential reactivity toward various TAFI forms. |
| 9      | Santamaria   | TAFIa                | TAFIa activity assay (colorimetric determination of substrate hippurate, used method by Mosnier et al, 1998) | Elevated TAFIa activity increases risk of CAD                                              | Isoforms have different stabilities.                                                                         |
| 10     | Schroeder    | TAFIa                | TAFIa activity assay (colorimetric determination of synthetic peptide substrate, Pefakit® by Pentapharm Ltd) | TAFIa activity was higher in CAD patients than controls                                    | Isoforms have different stabilities.                                                                         |
| 11     | Ladenvall    | Intact TAFI, TAFI-AP | ELISAs, in-house (monoclonal mouse IgG, developed by Ceresa et al, 2006)                                     | Elevated TAFI associated with increased risk of ischemic stroke                            | Validated common isoform-independent. Exclusively recognizes intact TAFI or TAFI-AP.                         |
| 12     | Leebeek      | TAFIa                | TAFIa activity assay (clot lysis assay, used by Guimaraes 2005)                                              | Elevated TAFI associated with increased risk of ischemic stroke                            | Isoforms have different stabilities.                                                                         |
| 13     | Montaner     | TAFI-Ag              | ELISA, Hyphen                                                                                                | Elevated TAFI                                                                              | No data on isoform-                                                                                          |

|    |               |               |                                                                                                                                   |                                                                           |                                                                                                              |
|----|---------------|---------------|-----------------------------------------------------------------------------------------------------------------------------------|---------------------------------------------------------------------------|--------------------------------------------------------------------------------------------------------------|
|    |               |               | BioMed (Zymutest TAFI-Ag kit)                                                                                                     | associated with increased risk of ischemic stroke                         | independent validation nor on possible differential reactivity toward various TAFI forms.                    |
| 14 | Chetaille     | TAFI-Ag       | ELISA, Milan Analytica (polyclonal sheep IgG)                                                                                     | TAFI-Ag stable within individuals, but large inter-individual variations. | †Not isoform insensitive.                                                                                    |
| 15 | Ariens        | TAFI-Ag       | ELISA, Affinity Biologicals (polyclonal sheep IgG)                                                                                | Heritability TAFI-Ag 82%                                                  | †Not isoform insensitive.                                                                                    |
| 16 | Bladbjerg     | TAFI-Ag       | ELISA, in-house (polyclonal sheep IgG, Affinity Biologicals)                                                                      | Heritability TAFI-Ag 71%                                                  | No data on isoform-independent validation nor on possible differential reactivity toward various TAFI forms. |
| 17 | Peetz         | TAFI-Ag       | ELISA, Affinity Biologicals (polyclonal sheep IgG)                                                                                | Heritability TAFI-Ag 76%                                                  | †Not isoform insensitive.                                                                                    |
| 18 | Sabater-Lleal | TAFI-Ag TAFIa | ELISA, Hyphen BioMed TAFIa activity assay (colorimetric determination of substrate hippurate), used method by Mosnier et al, 1998 | Heritability TAFI-Ag 41%<br>Heritability TAFIa activity 16%               | No data on isoform-independent validation nor on possible differential reactivity toward various TAFI forms. |
| 19 | Tregouet      | TAFI-Ag       | ELISA, Milan Analytica (polyclonal sheep IgG)                                                                                     | Variance explained by 2 SNPs 78%                                          | †Not isoform insensitive.                                                                                    |
| 20 | Warren        | TAFI-Ag       | ELISA, Enzyme Research Laboratories (polyclonal sheep IgG)                                                                        | Heritability TAFI-Ag 53%                                                  | No data on isoform-independent validation nor on possible differential reactivity toward various TAFI forms. |
| 21 | Brouwers      | TAFI-Ag       | Electroimmunoassay (polyclonal rabbit anti-TAFI)                                                                                  | Identified Thr325Ile SNP associated with TAFI-Ag levels                   | No data on isoform-independent validation nor on                                                             |

|    |           |                                |                                                                                                                                                                                                                                                   |                                                                |                                                                                                                                                                           |
|----|-----------|--------------------------------|---------------------------------------------------------------------------------------------------------------------------------------------------------------------------------------------------------------------------------------------------|----------------------------------------------------------------|---------------------------------------------------------------------------------------------------------------------------------------------------------------------------|
|    |           |                                | IgG, used by Van Tilburg)                                                                                                                                                                                                                         |                                                                | possible differential reactivity toward various TAFI forms.                                                                                                               |
| 22 | Henry     | TAFI-Ag                        | ELISA, Milan Analytica (polyclonal sheep IgG)                                                                                                                                                                                                     | Identified promoter and 3' SNPs associated with TAFI-Ag levels | †Not isoform insensitive.                                                                                                                                                 |
| 24 | Gils      | TAFI-Ag                        | Isoform-independent ELISA (monoclonal mouse IgG)                                                                                                                                                                                                  | Developed new isoform-insensitive TAFI assay                   | Validated common isoform-independent.                                                                                                                                     |
| 25 | Guimaraes | TAFI-Ag<br>TAFIa               | ELISA, commercial (Affinity Biologicals); Electroimmunoassay (by van Tilburg et al 2000); Chromogenic activity assay (Actichrome TAFI)                                                                                                            | CPB2 SNPs are associated with TAFI levels                      | Commercial kit not isoform insensitive. However, the two other methods supported their conclusions.                                                                       |
| 26 | Ceresa    | Intact TAFI, TAFI-AP, TAFIa/ai | ELISA, in-house (monoclonal mouse IgG)                                                                                                                                                                                                            | Developed new isoform-insensitive TAFI assays                  | Validated common isoform-independent. Exclusively recognizes intact TAFI or TAFI-AP, or TAFIa/ai.                                                                         |
| 38 | Frere     | TAFI-Ag<br>TAFIa               | ELISA, two in-house (monoclonal, including mouse 1B1) and Affinity Biologicals (polyclonal sheep) TAFIa activity assays, in-house (colorimetric determination of substrate, STA-Stachrom) and American Diagnostica (chromogenic assay, Actichrome | Variance explained by 5' and 3' CPB2 SNPs is 25%               | Isoform-independent assays used for both Ag and activity (no direct data on validation). No information about possible differential reactivity toward various TAFI forms. |

|    |         |         |                                                                                                      |                                                                                                         |                                                                                                                                            |
|----|---------|---------|------------------------------------------------------------------------------------------------------|---------------------------------------------------------------------------------------------------------|--------------------------------------------------------------------------------------------------------------------------------------------|
|    |         |         | TAFI)                                                                                                |                                                                                                         |                                                                                                                                            |
| 39 | Frere   | TAFI-Ag | ELISA, Diagnostica Stago (monoclonal antibodies 1B1/P4C2, Asserachrom, as used in Frere et al, 2005) | Transethnic haplotype analysis identified one 3' and two possible 5' SNPs as independent eQTLs          | Isoform-independent assay (no direct data on validation). No information about possible differential reactivity toward various TAFI forms. |
| 40 | Biswas  | TAFI-Ag | ELISA, Diagnostica STAGO (mouse monoclonal 1B1, Asserachrom CPB2)                                    | CPB2 polymorphisms are associated with TAFI-Ag but not stroke in Asian-Indian population                | No data on isoform-independent validation nor on possible differential reactivity toward various TAFI forms.                               |
| 41 | Morange | TAFI-Ag | ELISA, Diagnostica STAGO (mouse monoclonal 1B1, Asserachrom CPB2)                                    | CPB2 polymorphisms are associated with TAFI-Ag but relationship to coronary heart disease is less clear | Isoform-independent assay (no direct data on validation). No information about possible differential reactivity toward various TAFI forms  |

Abbreviations: TAFI<sub>a</sub>, active TAFI; TAFI<sub>ai</sub>, inactive form of TAFI resulting from a conformational change of TAFI<sub>a</sub>; TAFI-Ag, 'total' TAFI antigen.

Ref nr, reference number used in the main manuscript. †Demonstrated to be isoform-sensitive by Gils et al., 2003 (Ref 24 in main manuscript).
