# Supplementary material for: A Genome-wide Study of Common and Rare Genetic Variants Associated with Circulating Thrombin Activatable Fibrinolysis Inhibitor
Source: PubMed Central journal article supplement — Thromb Haemost. 2018 Jan 29;118(2):298–308. doi: 10.1160/TH17-04-0249 (PMC6260132; doi:10.1160/th17-04-0249), 2018-01-29
Supplement: 10-1160-th17-04-0249-s170249-4.pdf [file 10-1160-th17-04-0249-s170249-4.pdf]

|           |    |          |   |   |        |        |        |        |                                           |
|-----------|----|----------|---|---|--------|--------|--------|--------|-------------------------------------------|
| rs1080108 | 13 | 46516826 | G | A | 0.3799 | 0.9813 | 0.0391 | 0.0077 | 3.73E-07                                  |
| rs7333544 | 13 | 46517714 | G | A | 0.3803 | 0.9914 | 0.0389 | 0.0076 | 3.90E-07                                  |
| rs1080107 | 13 | 46516959 | A | C | 0.38   | 0.9865 | 0.0387 | 0.0077 | 4.63E-07                                  |
| rs7325308 | 13 | 46514662 | T | C | 0.3886 | 0.9836 | 0.0386 | 0.0077 | 4.85E-07                                  |
| rs9534261 | 13 | 46534058 | A | G | 0.3838 | 0.9889 | 0.0382 | 0.0076 | 6.37E-07                                  |
| rs1409436 | 13 | 46614650 | C | T | 0.399  | 0.9823 | 0.0379 | 0.0077 | 7.85E-07                                  |
| rs1926447 | 13 | 46629944 | G | A | 0.735  | 0.9909 | 0.0243 | 0.0107 | 0.02346 +1040C>T (Thr325Ile) <sup>2</sup> |

Intact TAFI levels were natural log transformed and adjusted for sex, age, case-control status and rs56734909

- 1 Zhao et al, 1998
- 2 Brouwers et al, 2001
- 3 Franco et al, 2001
- 4 Henry et al, 2001
- 5 Frere et al, 2006
